# Supplementary material for: Acetaminophen Induces an Antioxidative Response in Lettuce Plants
Source: MDPI journal article supplement (doi:10.3390/plants10061152), 2021-06-06
Supplement: s1 [file s1]

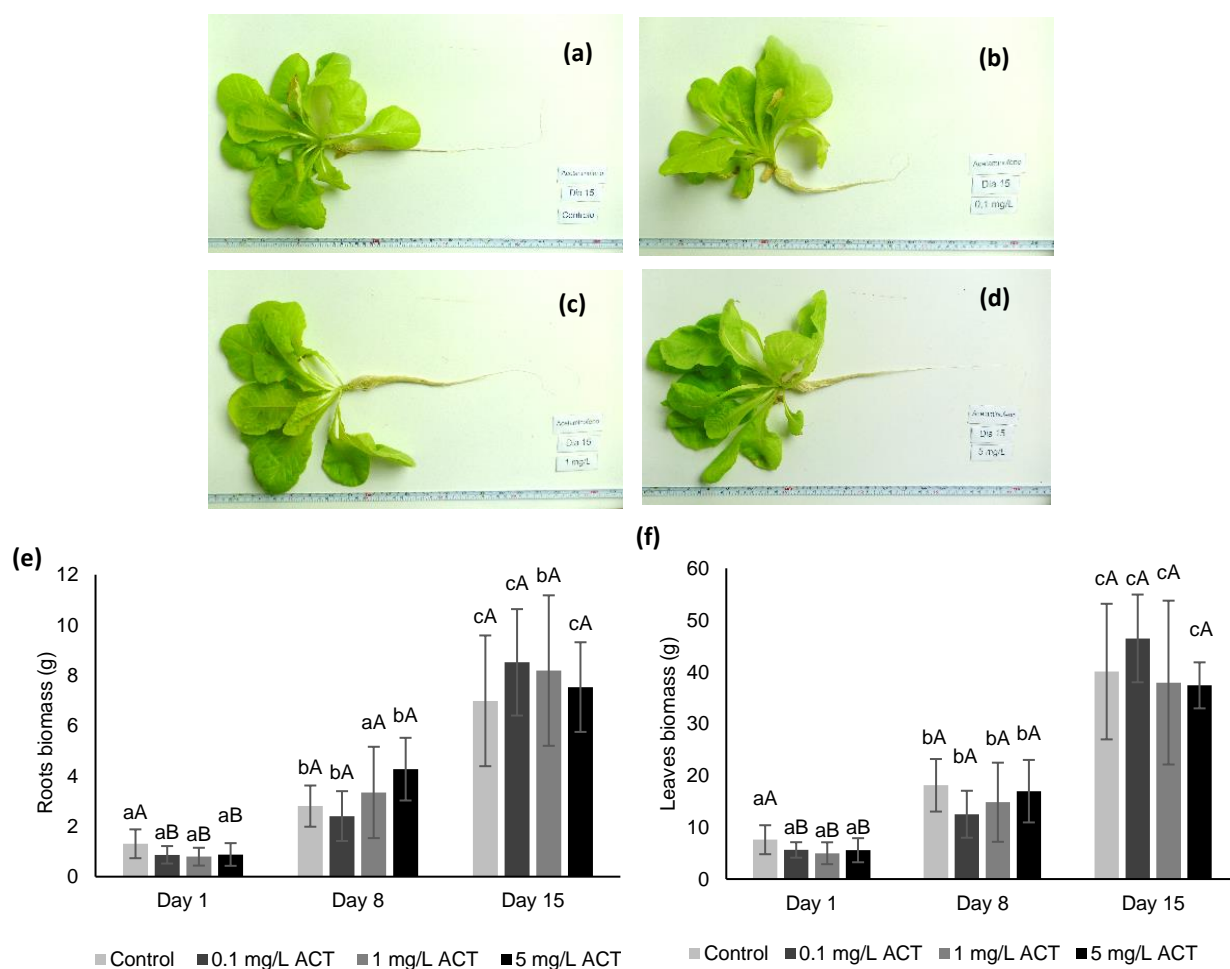

**Figure S2** – Lettuce plants on day 15 of contamination with ACT in different concentrations. Control (a), 0.1 mg L<sup>-1</sup> (b), 1 mg L<sup>-1</sup> (c), 5 mg L<sup>-1</sup> (d) and root (e) and leaf (f) masses. Different uppercase letters represent significant differences between different ACT concentrations at the same timepoint and different lowercase letters represent significant differences between treatment duration for the same ACT concentration.
