# Supplementary material for: Acetaminophen Induces an Antioxidative Response in Lettuce Plants
Source: MDPI journal article supplement (doi:10.3390/plants10061152), 2021-06-06
Supplement: s1 [file s1]

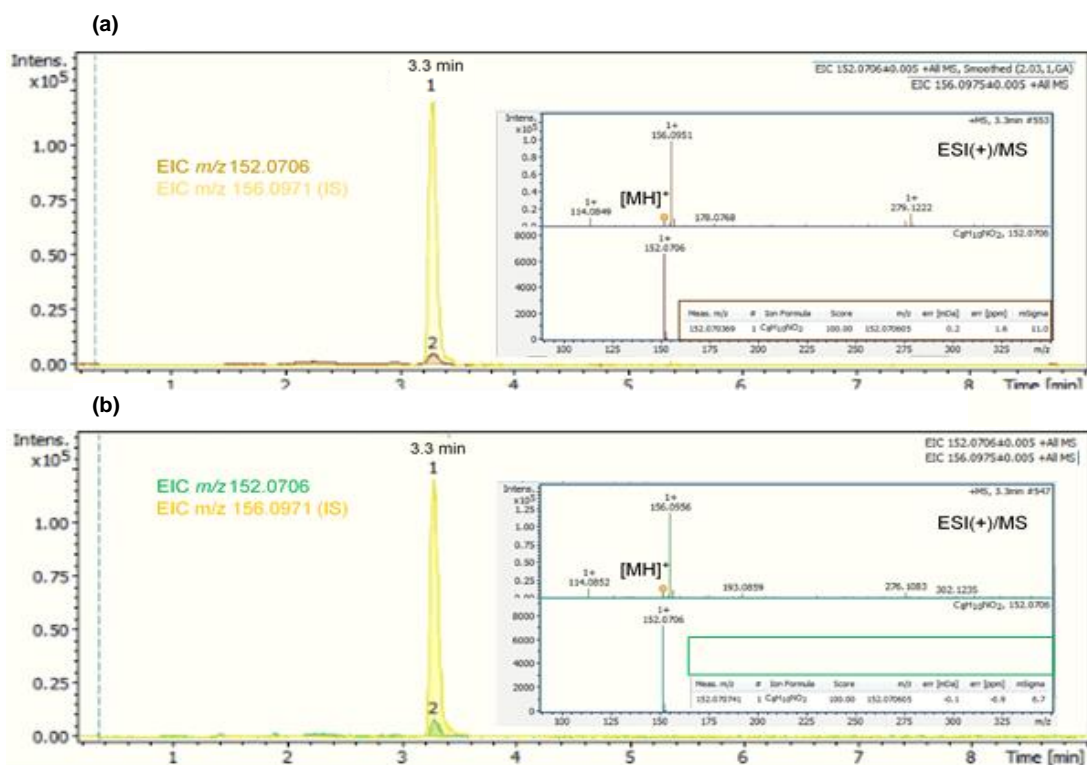

**FIGURE S1** – Typical extracted ion chromatograms obtained in the ESI positive mode for the protonated molecules of ACT ( $m/z$  152.0706) identified: (a) in roots and (b) in leaves, of the extracts of lettuce growing with  $0.1 \text{ mg L}^{-1}$  ACT, after 15 days of exposure. Peak 1 is due to the protonated molecule  $m/z$  156.0975 of the internal standard ACT-D4.
